# Supplementary material for: Freeze-Dried Immobilized Kefir Culture in Low Alcohol Winemaking
Source: PubMed Central journal article supplement (PMC7073665; doi:10.3390/foods9020115), 2020-01-21
Supplement: foods-09-00115-s001.pdf [file foods-09-00115-s001.pdf]

**Table S1.** Minor volatile compounds (mg/L) identified in low alcohol wines produced by wet or freeze-dried kefir culture at various temperatures (5–30 °C) using the HS-SPME GC/MS analysis. Volatiles were semi-quantified using 4-methyl-2-pentanol as internal standard.

| Compounds                                  | 30 °C |          |                    |          |                              |               |                     |              |                             |          |                    |             | 20 °C                        |             |                     |             |                             |              | 5 °C               |          |                              |          |                     |              |                             |              |
|--------------------------------------------|-------|----------|--------------------|----------|------------------------------|---------------|---------------------|--------------|-----------------------------|----------|--------------------|-------------|------------------------------|-------------|---------------------|-------------|-----------------------------|--------------|--------------------|----------|------------------------------|----------|---------------------|--------------|-----------------------------|--------------|
|                                            | K1    | F values | Free kefir culture |          | Kefir immob. on apple pieces |               | Kefir immob. on DCM |              | Kefir immob. on grape skins |          | Free kefir culture |             | Kefir immob. on apple pieces |             | Kefir immob. on DCM |             | Kefir immob. on grape skins |              | Free kefir culture |          | Kefir immob. on apple pieces |          | Kefir immob. on DCM |              | Kefir immob. on grape skins |              |
|                                            |       |          | W                  | Fd       | W                            | Fd            | W                   | Fd           | W                           | Fd       | W                  | Fd          | W                            | Fd          | W                   | Fd          | W                           | Fd           | W                  | Fd       | W                            | Fd       | W                   | Fd           | W                           | Fd           |
| <i>Esters</i>                              |       |          |                    |          |                              |               |                     |              |                             |          |                    |             |                              |             |                     |             |                             |              |                    |          |                              |          |                     |              |                             |              |
| Ethyl acetate                              | <700  |          | 1.2–<br>5.1        | 1.3<br>– | 4.7–6.1<br>15.5              | 10.2–<br>11.5 | 1.0–<br>7.5         | 2.6–<br>7    | 2.0<br>–                    | 4.0<br>– | 3.5–<br>8.4        | 2.0–<br>3.1 | 3.6–<br>6.9                  | 1.8–<br>7.5 | 4.0–<br>12.6        | 1.2–<br>3.5 | 6.2–<br>8.6                 | 5.1–<br>15.2 | 4.4–7.7            | 3.5–11.2 | 5.3–8.6                      | 5.9–24.3 | 6.8–<br>8.8         | 5.7–<br>9.0  | 3.3–<br>8.8                 | 6.1–<br>11.9 |
| Ethyl propanoate                           | 707   |          | <0.1–<br>0.1       | 0.0<br>– | <0.1–0.1<br>0.8              | 0.0–<br>0.1   | 0.0–<br>0.1         | 0.1<br>–     | <0.<br>1                    | 0.2<br>– | 0.2–<br>0.3        | 0.0–<br>0.3 | 0.0–<br>0.3                  | 0.0–<br>0.3 | 0.0–<br>0.2         | 0.0–<br>0.4 | 0.2–<br>0.4                 | 0.1–<br>0.8  | 0.2                | 0.0–0.1  | 0.1–0.8                      | 0.2–0.6  | 0.4–<br>0.5         | 0.0–<br>0.2  | 0.5–<br>1.3                 | 0.3–<br>0.7  |
| Isobutyl acetate                           | 745   |          | 0.0–<br><0.1       | 0.0<br>– | 0.0–0.1<br>0.2               | 0.0–<br>0.2   | <0.1–<br>0.2        | <0.1<br>–0.1 | 0.1<br>–                    | 0.2<br>– | 0.0–<br>0.1        | Nd<br>0.3   | 0.1–<br>0.1                  | 0.0–<br>0.2 | 0.0–<br>0.1         | 0.0–<br>0.3 | 0.2–<br>0.3                 | 0.0–<br><0.1 | 0.0–<br>Nd         | 0.0–0.1  | 0.0–0.1                      | 0.1      | Nd                  | <0.1<br>–0.1 | 0.1                         |              |
| Ethyl butyrate                             | 803   |          | 0.3–<br>0.4        | 0.0<br>– | 0.3–0.4<br>0.2               | 0.0–<br>0.6   | 0.1–<br>–0.3        | <0.1<br>–    | 0.2<br>–                    | 0.4<br>– | 0.4–<br>0.6        | 0.0–<br>0.2 | 0.5–<br>0.8                  | 0.3–<br>0.5 | 0.5–<br>0.9         | 0.2–<br>0.6 | 0.5–<br>0.9                 | 0.4–<br>1.3  | 0.4–0.5            | 0.0–0.3  | 0.3–1.0                      | 0.8–1.9  | 0.5–<br>0.8         | 1.0–<br>2.0  | 0.3–<br>0.7                 | 0.6–<br>0.7  |
| 3-methylbutyl acetate<br>(Isoamyl acetate) | 867   |          | 0.9–<br>1.3        | 0.0<br>– | 3.6–4.8<br>1.4               | 0.6–<br>4.6   | 1.5–<br>1.0         | 0.5–<br>–    | 2.6<br>–                    | 6.1<br>– | 3.7–<br>5.8        | 0.4–<br>1.1 | 7.0–<br>12.5                 | 1.0–<br>2.0 | 4.1–<br>10.3        | 0.7–<br>1.7 | 5.9–<br>14.0                | 5.5–<br>20.6 | 1.2–1.6            | 0.0–0.7  | 3.6–5.8                      | 0.5–1.3  | 4.9–<br>6.8         | 0.4–<br>2.3  | 2.3–<br>5.7                 | 4.1–<br>8.7  |
| 2-methylbutyl acetate                      | 869   |          | 0.0–<br>0.1        | 0.0<br>– | 0.3–0.4<br>0.3               | 0.0–<br>0.3   | 0.1–<br>0.3         | 0.0–<br>0.1  | 0.2<br>–                    | 0.4<br>– | 0.0–<br>0.3        | Nd<br>0.3   | 0.5–<br>0.8                  | 0.0–<br>0.2 | 0.0–<br>0.6         | 0.0–<br>0.2 | 0.3–<br>0.7                 | 0.3–<br>1.0  | 0.1                | 0.0–0.1  | 0.0–0.3                      | 0.0–0.1  | 0.3–<br>0.4         | Nd           | 0.2–<br>0.3                 | 0.2–<br>0.4  |



|                          |      |                                       |                                                                                                                                            |                                                                                                                                                                                                                           |                                                                                                                              |                                                                                                                                                                                                       |                                                                                                                                                                                             |                                                                                                                                                                                    |                                                                                                                                                                            |                                                                                                                                                                    |                                                                                                                                                          |                                                                                                                                                 |                                                                                                                                       |                                                                                                                              |                                                                                                                     |                                                                                                            |                                                                                                   |                                                                                          |                                                                                |                                                                  |                                                        |                                         |                               |                      |              |
|--------------------------|------|---------------------------------------|--------------------------------------------------------------------------------------------------------------------------------------------|---------------------------------------------------------------------------------------------------------------------------------------------------------------------------------------------------------------------------|------------------------------------------------------------------------------------------------------------------------------|-------------------------------------------------------------------------------------------------------------------------------------------------------------------------------------------------------|---------------------------------------------------------------------------------------------------------------------------------------------------------------------------------------------|------------------------------------------------------------------------------------------------------------------------------------------------------------------------------------|----------------------------------------------------------------------------------------------------------------------------------------------------------------------------|--------------------------------------------------------------------------------------------------------------------------------------------------------------------|----------------------------------------------------------------------------------------------------------------------------------------------------------|-------------------------------------------------------------------------------------------------------------------------------------------------|---------------------------------------------------------------------------------------------------------------------------------------|------------------------------------------------------------------------------------------------------------------------------|---------------------------------------------------------------------------------------------------------------------|------------------------------------------------------------------------------------------------------------|---------------------------------------------------------------------------------------------------|------------------------------------------------------------------------------------------|--------------------------------------------------------------------------------|------------------------------------------------------------------|--------------------------------------------------------|-----------------------------------------|-------------------------------|----------------------|--------------|
| Ethyl decanoate          | 1398 | 9.9–<br>37.0<br>6.9                   | 3.7<br>–<br>6.9                                                                                                                            | 7.0–11.1                                                                                                                                                                                                                  | 0.1–<br>2.7                                                                                                                  | 4.9–<br>9.6                                                                                                                                                                                           | 1.6–<br>5.1                                                                                                                                                                                 | 5.2<br>–<br>25.9                                                                                                                                                                   | 10.<br>1–<br>19.6                                                                                                                                                          | 6.3–<br>20.0                                                                                                                                                       | 1.9–<br>6.7                                                                                                                                              | 1.4–<br>18.5                                                                                                                                    | 4.8–<br>72.5                                                                                                                          | 1.1–<br>12.9                                                                                                                 | 4.3–<br>23.5                                                                                                        | 1.2–<br>27.9                                                                                               | 8.7–<br>12.6                                                                                      | 1.4–3.4                                                                                  | 0.0–4.3                                                                        | 2.9–4.1                                                          | 8.8–28.0                                               | 4.2–<br>5.0                             | 2.0–<br>13.6                  | 2.7–<br>9.0          | 1.0–<br>8.6  |
| 3-methylbutyl octanoate  | 1453 | 0.0–<br>0.2<br><0.1<br>1              | 0.0<br>–<br><0.1<br>1                                                                                                                      | 0.1–0.2                                                                                                                                                                                                                   | Nd<br>0.1                                                                                                                    | Nd<br>0.1                                                                                                                                                                                             | 0.0<br>0.1                                                                                                                                                                                  | 0.1<br>–<br>0.2<br>0.4                                                                                                                                                             | 0.0–<br>0.2                                                                                                                                                                | Nd<br>0.6                                                                                                                                                          | 0.0–<br>0.9                                                                                                                                              | 0.0–<br>0.1                                                                                                                                     | 0.0–<br>0.3                                                                                                                           | 0.0–<br>0.3                                                                                                                  | Nd<br>0.3                                                                                                           | Nd                                                                                                         | Nd                                                                                                | 0.0–0.1                                                                                  | 0.0–0.2                                                                        | 0.0–<br>0.3                                                      | Nd<br>0.3                                              | <0.1<br>–0.1                            | 0.0–<br><0.1                  |                      |              |
| Ethyl dodecanoate        | 1595 | <0.1–<br>0.3<br>0.1                   | 0.0<br>–<br>0.1                                                                                                                            | 0.1–0.4                                                                                                                                                                                                                   | 0.0–<br>0.4                                                                                                                  | 0.1–<br>0.2                                                                                                                                                                                           | 0.0–<br>0.1                                                                                                                                                                                 | 0.0<br>–<br>0.3<br>0.4                                                                                                                                                             | 0.2<br>0.2                                                                                                                                                                 | 0.0–<br>0.2                                                                                                                                                        | <0.1–<br>0.9                                                                                                                                             | 0.0–<br>1.5                                                                                                                                     | Nd<br>1.2                                                                                                                             | 0.1–<br>0.5                                                                                                                  | 0.2–<br>3.4                                                                                                         | 0.2–<br>3.4                                                                                                | 0.0–<br><0.1                                                                                      | Nd                                                                                       | <0.1–0.1                                                                       | 0.0–1.1                                                          | <0.1                                                   | Nd                                      | <0.1<br>–0.1                  | 0.0–<br>0.1          |              |
| Ethyl-9-hexadecanoate    | 1975 | Nd<br>d                               | N<br>d                                                                                                                                     | Nd                                                                                                                                                                                                                        | Nd                                                                                                                           | Nd                                                                                                                                                                                                    | N<br>d                                                                                                                                                                                      | Nd<br>d                                                                                                                                                                            | Nd                                                                                                                                                                         | Nd                                                                                                                                                                 | Nd                                                                                                                                                       | 0.0–<br>4.3                                                                                                                                     | Nd                                                                                                                                    | 0.0–<br><0.1                                                                                                                 | Nd                                                                                                                  | 0.0–<br>1.3                                                                                                | Nd                                                                                                | Nd                                                                                       | Nd                                                                             | 0.0–3.5                                                          | Nd                                                     | Nd                                      | Nd                            | 0.0–<br>0.1          |              |
| Ethyl hexadecanoate      | 1995 | Nd<br><0.1<br>1                       | 0–<br><0.1<br>1                                                                                                                            | Nd                                                                                                                                                                                                                        | <0.1–<br>0.2                                                                                                                 | Nd                                                                                                                                                                                                    | Nd                                                                                                                                                                                          | N<br>d<br>0.1                                                                                                                                                                      | 0.0<br>–<br>0.1                                                                                                                                                            | Nd                                                                                                                                                                 | 0.0–<br>0.1                                                                                                                                              | Nd                                                                                                                                              | 0.0–<br>1.7                                                                                                                           | Nd                                                                                                                           | 0.0–<br>0.1                                                                                                         | Nd                                                                                                         | 0.0–<br>0.6                                                                                       | Nd                                                                                       | Nd                                                                             | Nd                                                               | 0.0–0.6                                                | Nd                                      | Nd                            | Nd                   | 0.0–<br><0.1 |
| <b>Total esters</b>      |      | <b>54.0–<br/>104.6<br/>33.3<br/>3</b> | <b>28.<br/>8–<br/>96.7<br/>28.2<br/>81.8<br/>–<br/>9–<br/>6–<br/>181.9<br/>–<br/>205.1<br/>–<br/>–<br/>–<br/>–<br/>–<br/>75.0<br/>73.4</b> | <b>60.6–<br/>19.9–<br/>48.8–<br/>38.1<br/>42.<br/>74.<br/>84.0–<br/>28.5<br/>60.6–<br/>57.0<br/>36.3<br/>90.7<br/>38.6<br/>67.3<br/>60.3–<br/>16.3–78.8<br/>61.1–<br/>91.5–215.2<br/>93.9–<br/>53.4<br/>58.9<br/>31.8</b> | <b>19.9–<br/>28.2<br/>81.8<br/>–<br/>9–<br/>6–<br/>181.9<br/>–<br/>205.1<br/>–<br/>–<br/>–<br/>–<br/>–<br/>75.0<br/>73.4</b> | <b>48.8–<br/>38.1<br/>42.<br/>74.<br/>84.0–<br/>28.5<br/>60.6–<br/>57.0<br/>36.3<br/>90.7<br/>38.6<br/>67.3<br/>60.3–<br/>16.3–78.8<br/>61.1–<br/>91.5–215.2<br/>93.9–<br/>53.4<br/>58.9<br/>31.8</b> | <b>38.1<br/>42.<br/>74.<br/>84.0–<br/>28.5<br/>60.6–<br/>57.0<br/>36.3<br/>90.7<br/>38.6<br/>67.3<br/>60.3–<br/>16.3–78.8<br/>61.1–<br/>91.5–215.2<br/>93.9–<br/>53.4<br/>58.9<br/>31.8</b> | <b>42.<br/>74.<br/>84.0–<br/>28.5<br/>60.6–<br/>57.0<br/>36.3<br/>90.7<br/>38.6<br/>67.3<br/>60.3–<br/>16.3–78.8<br/>61.1–<br/>91.5–215.2<br/>93.9–<br/>53.4<br/>58.9<br/>31.8</b> | <b>74.<br/>84.0–<br/>28.5<br/>60.6–<br/>57.0<br/>36.3<br/>90.7<br/>38.6<br/>67.3<br/>60.3–<br/>16.3–78.8<br/>61.1–<br/>91.5–215.2<br/>93.9–<br/>53.4<br/>58.9<br/>31.8</b> | <b>84.0–<br/>28.5<br/>60.6–<br/>57.0<br/>36.3<br/>90.7<br/>38.6<br/>67.3<br/>60.3–<br/>16.3–78.8<br/>61.1–<br/>91.5–215.2<br/>93.9–<br/>53.4<br/>58.9<br/>31.8</b> | <b>28.5<br/>60.6–<br/>57.0<br/>36.3<br/>90.7<br/>38.6<br/>67.3<br/>60.3–<br/>16.3–78.8<br/>61.1–<br/>91.5–215.2<br/>93.9–<br/>53.4<br/>58.9<br/>31.8</b> | <b>60.6–<br/>57.0<br/>36.3<br/>90.7<br/>38.6<br/>67.3<br/>60.3–<br/>16.3–78.8<br/>61.1–<br/>91.5–215.2<br/>93.9–<br/>53.4<br/>58.9<br/>31.8</b> | <b>57.0<br/>36.3<br/>90.7<br/>38.6<br/>67.3<br/>60.3–<br/>16.3–78.8<br/>61.1–<br/>91.5–215.2<br/>93.9–<br/>53.4<br/>58.9<br/>31.8</b> | <b>36.3<br/>90.7<br/>38.6<br/>67.3<br/>60.3–<br/>16.3–78.8<br/>61.1–<br/>91.5–215.2<br/>93.9–<br/>53.4<br/>58.9<br/>31.8</b> | <b>90.7<br/>38.6<br/>67.3<br/>60.3–<br/>16.3–78.8<br/>61.1–<br/>91.5–215.2<br/>93.9–<br/>53.4<br/>58.9<br/>31.8</b> | <b>38.6<br/>67.3<br/>60.3–<br/>16.3–78.8<br/>61.1–<br/>91.5–215.2<br/>93.9–<br/>53.4<br/>58.9<br/>31.8</b> | <b>67.3<br/>60.3–<br/>16.3–78.8<br/>61.1–<br/>91.5–215.2<br/>93.9–<br/>53.4<br/>58.9<br/>31.8</b> | <b>60.3–<br/>16.3–78.8<br/>61.1–<br/>91.5–215.2<br/>93.9–<br/>53.4<br/>58.9<br/>31.8</b> | <b>16.3–78.8<br/>61.1–<br/>91.5–215.2<br/>93.9–<br/>53.4<br/>58.9<br/>31.8</b> | <b>61.1–<br/>91.5–215.2<br/>93.9–<br/>53.4<br/>58.9<br/>31.8</b> | <b>91.5–215.2<br/>93.9–<br/>53.4<br/>58.9<br/>31.8</b> | <b>93.9–<br/>53.4<br/>58.9<br/>31.8</b> | <b>53.4<br/>58.9<br/>31.8</b> | <b>58.9<br/>31.8</b> | <b>31.8</b>  |
| State of the cells       |      | 2.69                                  |                                                                                                                                            |                                                                                                                                                                                                                           |                                                                                                                              |                                                                                                                                                                                                       |                                                                                                                                                                                             |                                                                                                                                                                                    |                                                                                                                                                                            |                                                                                                                                                                    |                                                                                                                                                          |                                                                                                                                                 |                                                                                                                                       |                                                                                                                              |                                                                                                                     |                                                                                                            |                                                                                                   |                                                                                          |                                                                                |                                                                  |                                                        |                                         |                               |                      |              |
| Nature of kefir culture  |      | 3.54*                                 |                                                                                                                                            |                                                                                                                                                                                                                           |                                                                                                                              |                                                                                                                                                                                                       |                                                                                                                                                                                             |                                                                                                                                                                                    |                                                                                                                                                                            |                                                                                                                                                                    |                                                                                                                                                          |                                                                                                                                                 |                                                                                                                                       |                                                                                                                              |                                                                                                                     |                                                                                                            |                                                                                                   |                                                                                          |                                                                                |                                                                  |                                                        |                                         |                               |                      |              |
| Fermentation temperature |      | 10.20**                               |                                                                                                                                            |                                                                                                                                                                                                                           |                                                                                                                              |                                                                                                                                                                                                       |                                                                                                                                                                                             |                                                                                                                                                                                    |                                                                                                                                                                            |                                                                                                                                                                    |                                                                                                                                                          |                                                                                                                                                 |                                                                                                                                       |                                                                                                                              |                                                                                                                     |                                                                                                            |                                                                                                   |                                                                                          |                                                                                |                                                                  |                                                        |                                         |                               |                      |              |
| All interactions         |      | 1.40                                  |                                                                                                                                            |                                                                                                                                                                                                                           |                                                                                                                              |                                                                                                                                                                                                       |                                                                                                                                                                                             |                                                                                                                                                                                    |                                                                                                                                                                            |                                                                                                                                                                    |                                                                                                                                                          |                                                                                                                                                 |                                                                                                                                       |                                                                                                                              |                                                                                                                     |                                                                                                            |                                                                                                   |                                                                                          |                                                                                |                                                                  |                                                        |                                         |                               |                      |              |
| <i>Organic acids</i>     |      |                                       |                                                                                                                                            |                                                                                                                                                                                                                           |                                                                                                                              |                                                                                                                                                                                                       |                                                                                                                                                                                             |                                                                                                                                                                                    |                                                                                                                                                                            |                                                                                                                                                                    |                                                                                                                                                          |                                                                                                                                                 |                                                                                                                                       |                                                                                                                              |                                                                                                                     |                                                                                                            |                                                                                                   |                                                                                          |                                                                                |                                                                  |                                                        |                                         |                               |                      |              |
| Hexanoic acid            | 1005 | Nd<br>d                               | N<br>d                                                                                                                                     | Nd                                                                                                                                                                                                                        | Nd                                                                                                                           | Nd                                                                                                                                                                                                    | N<br>d                                                                                                                                                                                      | Nd                                                                                                                                                                                 | Nd                                                                                                                                                                         | Nd                                                                                                                                                                 | Nd                                                                                                                                                       | Nd                                                                                                                                              | Nd                                                                                                                                    | Nd                                                                                                                           | Nd                                                                                                                  | Nd                                                                                                         | Nd                                                                                                | 0.0–0.2                                                                                  | Nd                                                                             | Nd                                                               | Nd                                                     | 0.1–<br>0.7                             | Nd                            | 0.0–<br>0.3          | Nd           |

|                                         |         |                             |                        |                |               |                     |                     |                  |                  |                     |             |                     |                     |                     |                     |                     |                     |                |                |                |                |                      |              |                     |                     |  |
|-----------------------------------------|---------|-----------------------------|------------------------|----------------|---------------|---------------------|---------------------|------------------|------------------|---------------------|-------------|---------------------|---------------------|---------------------|---------------------|---------------------|---------------------|----------------|----------------|----------------|----------------|----------------------|--------------|---------------------|---------------------|--|
| Octanoic acid                           | 1198    | 0.4-<br>2.1<br>1.2          | 0.0<br>-<br>-          | 2.8-3.2        | Nd            | 0.3-<br>1.9         | 0.0-<br>0.5         | 0.0<br>-         | 1.0<br>-         | 0.0-<br>2.8         | Nd          | 1.1-<br>3.1         | 0.0-<br>3.8         | 0.0-<br>3.1         | 0.0-<br>0.7         | 0.1-<br>4.4         | 1.2-<br>2.9         | 0.9-1.5        | 0.0-0.3        | 1.1-2.2        | 0.0-2.3        | 4.1-<br>8.9          | Nd           | 0.4-<br>3.0         | 0.0-<br>1.6         |  |
| Decanoic acid                           | 1381    | 0.0-<br>3.3<br>0.4          | 0.0<br>-<br>-          | 0.3-0.6        | Nd            | <0.1-<br>0.3        | Nd<br>-             | 0.0<br>1-        | <0.<br>0.5       | 0.0-<br>-           | Nd          | 0.0-<br>1.2         | 0.0-<br>1.8         | 0.0-<br>0.2         | 0.0-<br>0.2         | 0.0-<br>1.6         | 0.0-<br>1.3         | 0.0-0.1        | Nd             | 0.0-0.3        | 0.0-0.4        | 0.1-<br>1.5          | Nd           | 0.3-<br>1.8         | 0.0-<br>0.3         |  |
| <b>Total organic acids</b>              |         | <b>0.4-<br/>4.4<br/>1.6</b> | <b>0.0<br/>-<br/>-</b> | <b>3.2-3.8</b> | <b>Nd</b>     | <b>0.3-<br/>2.2</b> | <b>0.0-<br/>0.5</b> | <b>0.0<br/>-</b> | <b>1.0<br/>-</b> | <b>0.0-<br/>3.3</b> | <b>Nd</b>   | <b>1.2-<br/>3.4</b> | <b>0.0-<br/>5.6</b> | <b>0.0-<br/>3.1</b> | <b>0.0-<br/>0.9</b> | <b>0.1-<br/>4.9</b> | <b>1.2-<br/>3.5</b> | <b>1.1-1.6</b> | <b>0.0-0.3</b> | <b>1.3-2.5</b> | <b>0.0-2.7</b> | <b>4.8-<br/>10.6</b> | <b>Nd</b>    | <b>0.7-<br/>5.1</b> | <b>0.0-<br/>1.9</b> |  |
| State of the cells                      | 18.70** |                             |                        |                |               |                     |                     |                  |                  |                     |             |                     |                     |                     |                     |                     |                     |                |                |                |                |                      |              |                     |                     |  |
| Nature of kefir culture                 | 2.93*   |                             |                        |                |               |                     |                     |                  |                  |                     |             |                     |                     |                     |                     |                     |                     |                |                |                |                |                      |              |                     |                     |  |
| Fermentation temperature                | 0.14    |                             |                        |                |               |                     |                     |                  |                  |                     |             |                     |                     |                     |                     |                     |                     |                |                |                |                |                      |              |                     |                     |  |
| All interactions                        | 4.00**  |                             |                        |                |               |                     |                     |                  |                  |                     |             |                     |                     |                     |                     |                     |                     |                |                |                |                |                      |              |                     |                     |  |
| <i>Alcohols</i>                         |         |                             |                        |                |               |                     |                     |                  |                  |                     |             |                     |                     |                     |                     |                     |                     |                |                |                |                |                      |              |                     |                     |  |
| 2-methyl-1-propanol<br>(Isobutanol)     | <700    | 0.3-<br>0.5<br>3.0          | 1.0<br>-<br>-          | 0.8-1.6        | 0.6-<br>7.4   | 0.3-<br>1.3         | 1.4-<br>1.8         | 1.3<br>-         | 1.6<br>-         | 0.4-<br>1.5         | 0.8-<br>1.6 | 0.4-<br>1.6         | 1.0-<br>1.6         | 0.6-<br>1.6         | 0.3-<br>1.4         | 1.0-<br>2.7         | 1.3-<br>2.4         | 0.1-0.2        | 0.0-0.3        | 0.0-0.4        | 0.7-2.1        | 0.4-<br>0.6          | 0.5-<br>1.5  | 0.2-<br>0.6         | 0.9-<br>1.5         |  |
| 3-methyl-1-butanol<br>(Isoamyl alcohol) | 721     | 11.0-<br>24.0<br>28.<br>6   | 22.<br>9-<br>-         | 19.8-<br>45.0  | 10.8-<br>71.8 | 11.5-<br>37.8       | 19.9<br>-           | 19.<br>3-        | 39.<br>0-        | 17.6-<br>37.8       | 17.8<br>-   | 9.9-<br>40.4        | 20.7<br>-           | 21.7<br>-           | 10.1<br>-           | 23.8<br>-           | 28.4<br>-           | 5.1-6.8        | 5.6-11.4       | 5.6-22.8       | 17.6-32.1      | 12.4-<br>19.1        | 16.8<br>-    | 6.8-<br>19.1        | 15.6<br>-           |  |
| 2-methyl-1-butanol<br>(Amyl alcohol)    | 722     | 0.0-<br>3.0<br>10.<br>7     | 6.5<br>-<br>-          | 5.1-9.0        | 4.3-<br>20.2  | 2.7-<br>6.9         | 5.5-<br>8.9         | 2.8<br>-         | 6.0<br>-         | 5.4-<br>12.5        | 4.9-<br>8.3 | 2.4-<br>7.1         | 4.4-<br>13.4        | 4.4-<br>10.6        | 1.9-<br>5.7         | 5.1-<br>7.5         | 5.9-<br>11.5        | 1.8-2.4        | 2.3-4.9        | 1.3-3.7        | 4.0-8.4        | 2.7-<br>3.9          | 4.7-<br>12.3 | 1.9-<br>3.6         | 3.5-<br>7.0         |  |
| 2,3-butanediol                          | 756     | 0.1-<br>0.3<br>0.1          | 0.0<br>-<br>-          | 0.0-0.2        | 0.0-<br>0.2   | <0.1-<br>0.1        | 0.0-<br>0.5         | 0.0<br>-         | 0.0<br>-         | 0.0-<br>0.1         | Nd          | 0.0-<br>0.3         | Nd                  | 0.0-<br>0.9         | Nd                  | 0.0-<br>0.1         | Nd                  | <0.1-<br>0.1   | Nd             | <0.1-0.2       | Nd             | 0.0-<br>0.1          | Nd           | <0.1<br>0.4         | 0.0-<br>0.4         |  |

|                                                      |      |                                     |                                 |                                 |                       |                             |                                  |                                 |                                 |                                |                            |                             |                                  |                                  |                                  |                                  |                                  |                      |                 |                       |                  |                       |                            |                            |                            |
|------------------------------------------------------|------|-------------------------------------|---------------------------------|---------------------------------|-----------------------|-----------------------------|----------------------------------|---------------------------------|---------------------------------|--------------------------------|----------------------------|-----------------------------|----------------------------------|----------------------------------|----------------------------------|----------------------------------|----------------------------------|----------------------|-----------------|-----------------------|------------------|-----------------------|----------------------------|----------------------------|----------------------------|
| 2-phenylethanol                                      | 1133 | 1.1-<br>11.4<br>7.1                 | 0.5<br>-                        | 7.4-13.4                        | 0.2-<br>2.0           | 3.7-<br>8.3                 | 2.2-<br>3.5                      | 1.3<br>-                        | 3.3<br>-                        | 0.6-<br>8.0                    | 0.8-<br>2.8                | 2.8-<br>10.2                | 2.2-<br>4.0                      | 0.0-<br>6.2                      | 0.5-<br>2.6                      | 1.5-<br>7.1                      | 0.9-<br>3.7                      | 1.4-1.8              | 0.0-0.6         | 1.5-2.6               | 0.0-1.4          | 1.3-<br>3.5           | 0.0-<br>0.2                | 0.7-<br>2.7                | 0.0-<br>2.9                |
| 3,7-dimethyl-6-octen-1-ol (Citronellol)              | 1235 | 0.1-<br>0.4<br>0.4                  | 0.1<br>-                        | 0.1-0.2                         | Nd<br>0.1             | 0.1<br>0.2                  | 0.0-<br>0.0                      | 0.0<br>-                        | 0.2<br>-                        | 0.0-<br>0.2                    | Nd<br>0.2                  | <0.1-<br>0.2                | 0.0-<br>0.4                      | 0.0-<br>0.1                      | 0.0-<br>0.2                      | 0.0-<br>0.1                      | 0.0-<br>0.2                      | 0.4-0.7              | 0.0-0.1         | 0.2-0.4               | 0.0-0.2          | 0.2-<br>0.3           | 0.0-<br>0.1                | 0.2-<br>0.4                | 0.0-<br>0.2                |
| 2,4-bis(1,1-dimethylethyl)-phenol                    | 1516 | 0.3-<br>2.2<br>3.1                  | 1.2<br>-                        | 0.5-1.0                         | 1.6-<br>3.1           | 0.3-<br>0.7                 | 0.7-<br>2.0                      | 0.2<br>-                        | 1.2<br>-                        | 0.0-<br>0.6                    | 0.6-<br>4.2                | 0.0-<br>0.7                 | 1.5-<br>7.3                      | 0.0-<br>0.2                      | 1.6-<br>10.0                     | 0.0-<br>0.6                      | 0.9-<br>2.1                      | 0.3-1.6              | 0.3-17.3        | 0.2-0.5               | 1.4-4.5          | 0.5-<br>0.7           | 1.7-<br>17.9               | 0.3-<br>0.8                | 0.9-<br>2.3                |
| 3,7,11-trimethyl-1,6,10-dodecatrien-3-ol (Nerolidol) | 1565 | 0.0-<br>0.4<br>0.4                  | 0.1<br>-                        | 0.1-0.2                         | Nd<br>0.1             | <0.1-<br>0.1                | Nd<br>-                          | 0.0<br>1-                       | <0.0<br>0.1                     | 0.0-<br>0.1                    | 0.0-<br>0.1                | 0.0-<br>0.2                 | 0.0-<br>11.3                     | Nd<br>0.1                        | 0.0-<br>0.1                      | Nd<br>0.1                        | Nd                               | 0.1                  | Nd              | 0.1                   | Nd               | 0.1                   | Nd                         | <0.1<br>-0.2               | 0.0-<br>0.1                |
| 3,7,11-trimethyl-2,6,10-dodecatrien-1-ol             | 1726 | 0.0-<br>0.2<br>0.3                  | 0.0<br>-                        | <0.1-0.1                        | Nd<br>Nd              | 0.0-<br>0.1                 | 0.0<br>-                         | 0.0<br>-                        | 0.0<br>0.3                      | Nd<br>0.2                      | Nd<br>0.2                  | 0.0-<br>0.2                 | 0.0-<br>0.2                      | Nd<br>0.3                        | 0.0-<br>0.3                      | Nd<br>0.3                        | Nd<br>0.3                        | Nd                   | Nd              | 0.1                   | 0.0-0.1          | <0.1<br>0.1           | Nd<br>0.1                  | 0.0-<br>0.1                | 0.0-<br>0.1                |
| <b>Total alcohols</b>                                |      | <b>16.2-<br/>39.4<br/>45.<br/>2</b> | <b>41.<br/>6-<br/>45.<br/>2</b> | <b>40.5-<br/>60.6<br/>102.6</b> | <b>18.9-<br/>54.3</b> | <b>18.7-<br/>-<br/>42.7</b> | <b>30.4<br/>1-<br/>52.<br/>0</b> | <b>27.<br/>6-<br/>76.<br/>0</b> | <b>51.<br/>6-<br/>76.<br/>9</b> | <b>28.8-<br/>52.4<br/>43.6</b> | <b>25.9<br/>-<br/>51.1</b> | <b>24.4-<br/>-<br/>51.1</b> | <b>32.2<br/>-<br/>-<br/>83.4</b> | <b>30.3<br/>-<br/>-<br/>53.9</b> | <b>17.6<br/>-<br/>-<br/>37.3</b> | <b>34.2<br/>-<br/>-<br/>55.9</b> | <b>40.5<br/>-<br/>-<br/>68.0</b> | <b>9.7-<br/>13.2</b> | <b>8.9-33.6</b> | <b>10.7-<br/>28.7</b> | <b>25.4-47.1</b> | <b>18.6-<br/>27.8</b> | <b>23.8<br/>-<br/>73.9</b> | <b>10.0<br/>-<br/>26.0</b> | <b>25.9<br/>-<br/>35.3</b> |
| State of the cells                                   |      | 9.91**                              |                                 |                                 |                       |                             |                                  |                                 |                                 |                                |                            |                             |                                  |                                  |                                  |                                  |                                  |                      |                 |                       |                  |                       |                            |                            |                            |
| Nature of kefir culture                              |      | 4.91**                              |                                 |                                 |                       |                             |                                  |                                 |                                 |                                |                            |                             |                                  |                                  |                                  |                                  |                                  |                      |                 |                       |                  |                       |                            |                            |                            |
| Fermentation temperature                             |      | 14.54**                             |                                 |                                 |                       |                             |                                  |                                 |                                 |                                |                            |                             |                                  |                                  |                                  |                                  |                                  |                      |                 |                       |                  |                       |                            |                            |                            |
| All interactions                                     |      | 0.84                                |                                 |                                 |                       |                             |                                  |                                 |                                 |                                |                            |                             |                                  |                                  |                                  |                                  |                                  |                      |                 |                       |                  |                       |                            |                            |                            |

Carbonyl compounds



|                                         |      |                      |          |         |              |             |             |          |                   |             |              |              |             |             |             |             |              |         |         |         |         |             |             |              |              |
|-----------------------------------------|------|----------------------|----------|---------|--------------|-------------|-------------|----------|-------------------|-------------|--------------|--------------|-------------|-------------|-------------|-------------|--------------|---------|---------|---------|---------|-------------|-------------|--------------|--------------|
| 1,1-diethoxy-ethane<br>(Acetal)         | 716  | 0.8-<br>2.9<br>0.9   | 0.5<br>- | 0.0-0.3 | 0.7-<br>1.2  | 0.1-<br>0.9 | 0.3-<br>1.0 | N<br>d   | 0.3<br>-          | 1.1-<br>4.9 | 0.1-<br>0.9  | 0.0-<br>1.3  | 0.1-<br>2.0 | 0.0-<br>1.2 | 0.1-<br>1.1 | 0.2-<br>1.0 | 0.2-<br>0.6  | 1.0-2.8 | 0.4-1.8 | 0.0-0.6 | 0.6-6.2 | 0.3-<br>0.7 | 1.0-<br>1.1 | 0.2-<br>0.7  | 0.5-<br>1.3  |
| Toluene                                 | 735  | 0.0-<br>0.2<br>0.1   | 0.0<br>- | 0.0-0.2 | Nd<br>0.2    | 0.0-<br>0.1 | 0.0-<br>0.1 | N<br>d   | 0.0<br>-          | 0.0-<br>0.1 | Nd<br>0.1    | 0.0-<br>0.1  | Nd<br>0.2   | 0.0-<br>0.2 | Nd<br>0.2   | 0.0-<br>0.2 | 0.0-<br>0.2  | 0.1-0.2 | Nd      | 0.0-0.1 | 0.0-0.1 | Nd          | Nd          | 0.1-<br>0.2  | Nd           |
| 2,4-dimethyl-heptane                    | 815  | Nd<br>-<br>0.1       | 0.0<br>- | Nd      | Nd           | Nd          | Nd          | N<br>d   | 0.0<br>-          | Nd          | 0.0-<br>0.2  | Nd<br>0.2    | 0.0-<br>0.2 | Nd<br>0.2   | 0.0-<br>0.2 | 0.0-<br>0.3 | 0.0-<br><0.1 | 0.0-0.1 | Nd      | 0.0-0.1 | 0.0-0.1 | Nd          | Nd          | <0.1<br><0.1 | 0.0-<br><0.1 |
| 1,3,5-trimethyl-benzene<br>(Mesitylene) | 956  | 0.3-<br>0.6<br>0.3   | 0.2<br>- | 0.4-0.7 | 0.0-<br>0.1  | 0.4-<br>0.5 | 0.2-<br>0.3 | 0.1<br>- | 0.3<br>-          | 0.4-<br>0.5 | 0.0-<br>0.4  | 0.3-<br>0.6  | 0.0-<br>0.6 | 0.0-<br>0.4 | 0.0-<br>0.4 | 0.0-<br>0.5 | 0.0-<br>0.4  | 0.4-0.6 | 0.0-0.2 | 0.3-0.5 | 0.0-0.4 | 0.3-<br>0.4 | 0.0-<br>0.1 | 0.3-<br>0.4  | 0.0-<br>0.3  |
| Decane                                  | 999  | Nd<br>-<br><0.1<br>1 | 0.0<br>- | Nd      | Nd           | Nd          | Nd          | N<br>d   | 0.0<br>-          | Nd          | Nd           | Nd           | 0.0-<br>0.2 | Nd<br>0.2   | 0.0-<br>0.2 | Nd<br>0.4   | 0.0-0.1      | Nd      | 0.0-0.1 | Nd      | Nd      | Nd          | 0.0-<br>0.1 | 0.0-<br><0.1 |              |
| 4-methyl-decane                         | 1023 | <0.1-<br>0.1<br>0.1  | 0.0<br>- | 0.0-0.1 | Nd<br>0.1    | 0.0-<br>0.1 | 0.0-<br>0.1 | N<br>d   | 0.1<br>-          | Nd          | 0.0-<br><0.1 | 0.0-<br><0.1 | 0.0-<br>0.3 | Nd<br>0.2   | 0.0-<br>0.1 | Nd<br>0.4   | 0.0-<br>0.1  | 0.0-0.1 | Nd      | 0.0-0.1 | Nd      | 0.0-<br>0.1 | Nd          | 0.0-<br><0.1 | 0.1-<br>0.5  |
| 4,7-dimethyl-undecane                   | 1067 | 0.0-<br>0.2<br>0.2   | 0.0<br>- | 0.0-0.2 | 0.0-<br><0.1 | 0.2<br>0.1  | 0.0-<br>0.1 | 0.0<br>- | 0.1<br>-          | 0.0-<br>0.2 | 0.0-<br>0.3  | 0.0-<br>0.2  | Nd<br>0.2   | 0.0-<br>0.1 | Nd<br>0.2   | 0.0-<br>0.2 | 0.0-<br>0.2  | 0.1-0.3 | 0.0-0.1 | 0.0-0.2 | 0.0-0.2 | 0.0-<br>0.1 | Nd          | 0.0-<br>0.1  | 0.0-<br><0.1 |
| 2,6-dimethyl-undecane                   | 1216 | 0.1-<br>0.3<br>0.1   | 0.0<br>- | 0.0-0.3 | Nd<br>0.2    | 0.1-<br>0.1 | 0.0-<br>0.1 | N<br>d   | <0.1<br>1-<br>0.4 | 0.0-<br>0.1 | 0.0-<br>0.4  | 0.1-<br>0.3  | 0.0-<br>0.5 | 0.0-<br>0.1 | 0.0-<br>0.2 | Nd<br>0.3   | 0.0-<br>0.3  | 0.1-0.2 | 0.0-0.1 | 0.1-0.2 | 0.0-0.1 | 0.0-<br>0.2 | Nd          | 0.1-<br>0.2  | 0.0-<br>0.1  |
| 4,8-dimethyl-undecane                   | 1226 | <0.1-<br>0.1<br>0.1  | 0.0<br>- | 0.1-0.2 | Nd<br>0.1    | 0.1<br>0.1  | 0.0-<br>0.1 | 0.0<br>- | 0.0<br>-          | 0.0-<br>0.1 | Nd           | Nd           | Nd          | 0.0-<br>0.1 | Nd<br>0.1   | 0.0-<br>0.1 | Nd           | 0.1     | Nd      | 0.1     | 0.0-0.1 | 0.1-<br>0.2 | Nd          | <0.1<br><0.1 | 0.0-<br>0.1  |





|                          |        |
|--------------------------|--------|
| State of the cells       | 0.55   |
| Nature of kefir culture  | 4.47** |
| Fermentation temperature | 8.72** |
| All interactions         | 1.19   |

---

W: Wet cells, Fd: Freeze-dried cells; Nd: Not detected; \* $p < 0.05$ , \*\* $p < 0.01$ .
